# Supplementary material for: Synthesis of a new copper(i) complex, [Cu(tmdcbpy)2]+ (tmdcbpy = 4,4′,6,6′-tetramethyl-2,2′-bipyridine-5,5′-dicarboxylic acid), and its application to solar cells
Source: Royal Society of Chemistry journal article supplement (doi:10.1039/b109518h), 2002-01-01
Supplement: fig.1.pdf [file fig.1.pdf]

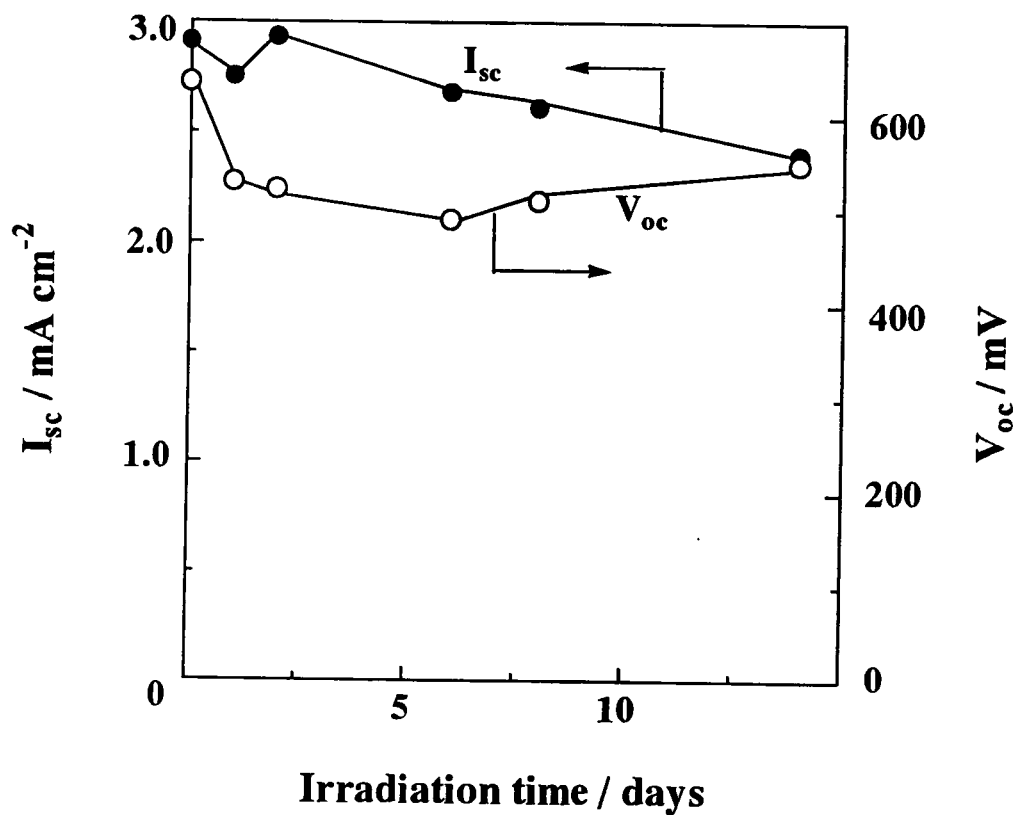

**Supporting Information Figure 1.** Persistence test of solar cell with  $[\text{Cu}(\text{tmdcbpy})_2]^+$ .<sup>a)</sup>

a) Electrolyte;  $0.40 \text{ mol dm}^{-3} \text{ KI} + 0.05 \text{ mol dm}^{-3} \text{ I}_2$  and  $1.0 \text{ mol dm}^{-3}$  4-t-butylpyridine in propylene carbonate / acetonitrile (11/1, v/v)
