# Supplementary material for: Synthesis of a new copper(i) complex, [Cu(tmdcbpy)2]+ (tmdcbpy = 4,4′,6,6′-tetramethyl-2,2′-bipyridine-5,5′-dicarboxylic acid), and its application to solar cells
Source: Royal Society of Chemistry journal article supplement (doi:10.1039/b109518h), 2002-01-01
Supplement: tables1.pdf [file tables1.pdf]

Supporting Information Table S1. Concentration effects of I<sub>2</sub>, KI, and 4-*tert*-butylpyridine (4-*t*BuPy) on open-circuit photovoltage (V<sub>oc</sub>) and short-circuit photo-current (I<sub>sc</sub>)

| Entry | KI <sup>a)</sup> | I <sub>2</sub> <sup>a)</sup> | 4- <i>t</i> BuPy <sup>a,b)</sup> | I <sub>sc</sub> <sup>c)</sup> | V <sub>oc</sub> <sup>d)</sup> |
|-------|------------------|------------------------------|----------------------------------|-------------------------------|-------------------------------|
| 1     | 0.10             | 0.05                         | 1.0                              | 1.09                          | 610                           |
| 2     | 0.20             | 0.05                         | 1.0                              | 0.94                          | 600                           |
| 3     | 0.35             | 0.05                         | 1.0                              | 2.48                          | 610                           |
| 4     | 0.40             | 0.05                         | 1.0                              | 2.91                          | 640                           |
| 5     | 0.42             | 0.05                         | 1.0                              | 2.62                          | 600                           |
| 6     | 0.40             | 0.02                         | 1.0                              | 1.99                          | 640                           |
| 7     | 0.40             | 0.05                         | 1.0                              | 2.91                          | 640                           |
| 8     | 0.40             | 0.08                         | 1.0                              | 2.43                          | 630                           |
| 9     | 0.40             | 0.10                         | 1.0                              | 2.15                          | 590                           |
| 10    | 0.40             | 0.05                         | 0.0                              | 1.98                          | 425                           |
| 11    | 0.40             | 0.05                         | 0.5                              | 2.41                          | 540                           |
| 12    | 0.40             | 0.05                         | 1.5                              | 1.19                          | 580                           |

a) mol dm<sup>-3</sup>.      b) 4-tertiary butylpyridine

c) mA cm<sup>-2</sup> (AM 1.5 100mW cm<sup>-2</sup>).      d) mV.
