# Supplementary material for: Synthesis of a new copper(i) complex, [Cu(tmdcbpy)2]+ (tmdcbpy = 4,4′,6,6′-tetramethyl-2,2′-bipyridine-5,5′-dicarboxylic acid), and its application to solar cells
Source: Royal Society of Chemistry journal article supplement (doi:10.1039/b109518h), 2002-01-01
Supplement: tables2.pdf [file tables2.pdf]

Supporting Information Table S2. The effects of sintering time at 450°C.<sup>a)</sup>

(A) The first sintering process

| entry | time / h | $I_{sc} / \text{mA cm}^{-2}$ | $V_{oc} / \text{mV}$ |
|-------|----------|------------------------------|----------------------|
| 1     | 0.5      | $2.10 \pm 0.11$              | $555 \pm 35$         |
| 2     | 1.0      | $2.00 \pm 0.38$              | $559 \pm 30$         |
| 3     | 2.0      | $2.05 \pm 0.11$              | $543 \pm 13$         |

(B) The second sintering process

| entry | time / h | $I_{sc} / \text{mA cm}^{-2}$ | $V_{oc} / \text{mV}$ |
|-------|----------|------------------------------|----------------------|
| 4     | 0.5      | $3.21 \pm 0.03$              | $603 \pm 15$         |
| 5     | 1.0      | $3.36 \pm 0.24$              | $627 \pm 3.3$        |
| 6     | 2.0      | $3.09 \pm 0.41$              | $637 \pm 3.0$        |

a)  $0.40 \text{ mol dm}^{-3}$  KI,  $0.05 \text{ mol dm}^{-3}$   $I_2$  and  $1.0 \text{ mol dm}^{-3}$  4-tert-butylpyridine in propylenecarbonate / acetonitrile (1/1, v/v)
