# Supplementary material for: Synthesis of a new copper(i) complex, [Cu(tmdcbpy)2]+ (tmdcbpy = 4,4′,6,6′-tetramethyl-2,2′-bipyridine-5,5′-dicarboxylic acid), and its application to solar cells
Source: Royal Society of Chemistry journal article supplement (doi:10.1039/b109518h), 2002-01-01
Supplement: tables3.pdf [file tables3.pdf]

Supporting Information Table S3. The effects of sintering time at 500°C.<sup>a)</sup>

(A) The first sintering process

| entry | time / h | $I_{sc} / \text{mA cm}^{-2}$ | $V_{oc} / \text{mV}$ |
|-------|----------|------------------------------|----------------------|
| 1     | 0.5      | $3.47 \pm 0.06$              | $601 \pm 1.4$        |
| 2     | 1.0      | $2.99 \pm 0.09$              | $584 \pm 4.9$        |
| 3     | 2.0      | $2.83 \pm 0.05$              | $543 \pm 6.4$        |

(B) The second sintering process

| entry | time / h | $I_{sc} / \text{mA cm}^{-2}$ | $V_{oc} / \text{mV}$ |
|-------|----------|------------------------------|----------------------|
| 4     | 0.5      | $3.88 \pm 0.07$              | $633 \pm 2.1$        |
| 5     | 1.0      | $2.49 \pm 0.02$              | $565 \pm 13$         |
| 6     | 2.0      | $2.03 \pm 0.52$              | $556 \pm 6.4$        |

a)  $0.40 \text{ mol dm}^{-3}$  KI,  $0.05 \text{ mol dm}^{-3}$   $\text{I}_2$  and  $1.0 \text{ mol dm}^{-3}$  4-tert-butylpyridine in propylenecarbonate / acetonitrile (11/1, v/v)
